# Supplementary material for: Misconceptions and Knowledge Gaps on Antibiotic Use in Primary Care – a Delphi Study in Four Sectors and Five European Countries
Source: Preprints.org preprint supplement (doi:10.20944/preprints202307.1235.v1), 2023-07-18

**Additional file 4. Communication tools**

1. Antibiotic Free Prescription
2. Poster in Consultation Room or Leaflet: Viruses or Bacteria: What Made you Sick?
3. Urinary Tract Infections: A Leaflet for Older Adults and Their Families
4. Poster: 5 Myths about Urinary Tract Infections in Nursing Home Residents
5. Checklist for Pharmacists: What you Need to Know if You Have Been Prescribed an Antibiotic
6. Information cards about Antimicrobial Resistance and the Use of Antibiotics

Patient name:

| Infection                                           | Most people get better by | Most common symptoms                                                            |
|-----------------------------------------------------|---------------------------|---------------------------------------------------------------------------------|
| <input type="checkbox"/> COVID-19                   | 1 - 3 weeks               | Fever, headache, loss of taste and/or smell                                     |
| <input type="checkbox"/> Common cold                | 1 - 2 weeks               | Runny nose, congestion, sore throat, dry cough                                  |
| <input type="checkbox"/> Flu                        | 1 - 2 weeks               | Fever, shivering, muscle pain, cough                                            |
| <input type="checkbox"/> Laryngitis                 | 1 - 2 weeks               | Dysphonia (hoarseness), sore throat, dry cough                                  |
| <input type="checkbox"/> Pharyngitis / Tonsilitis   | 1 week                    | Fever, sore throat symptoms: pain while swallowing, enlarged and painful glands |
| <input type="checkbox"/> Acute bronchitis           | 2 - 4 weeks               | Wheezing, cough with or without phlegm                                          |
| <input type="checkbox"/> Sinusitis                  | 1 - 2 weeks               | Facial pain, fever, runny nose, congestion                                      |
| <input type="checkbox"/> Acute middle ear infection | < 1 week                  | Ear pain, fever                                                                 |
| <input type="checkbox"/> Exacerbation of COPD       | 1 - 2 weeks               | Worsening of symptoms of COPD                                                   |

You probably have a self-limiting infection and that is why you have not been prescribed an antibiotic. Antibiotics are not effective in treating viral infections. If given when not needed, antibiotics can be harmful as they lead to antimicrobial resistance. This means that antibiotics become ineffective and infections become increasingly difficult to treat.

When you have an infection, it is very important to get plenty of rest and give your body time to fight it off. If you follow these instructions, you should feel better soon:

- ☐ Get plenty of rest and consider staying at home to prevent the spread of infection
- ☐ Remember to drink a sufficient amount of fluids to avoid dehydration
- ☐ Wash your hands frequently
- ☐ You can take over-the-counter medication to alleviate your symptoms as recommended below by your healthcare provider

To alleviate symptoms

- ☐ For fever and aches
- ☐ For sore throat
- ☐ For nasal congestion
- ☐ Other:

Please, return to your healthcare provider if:

- ☐ Your symptoms get worse / do not improve in day(s)
- ☐ You develop a high fever
- ☐ Other:

The Prescriber

CONTACT:

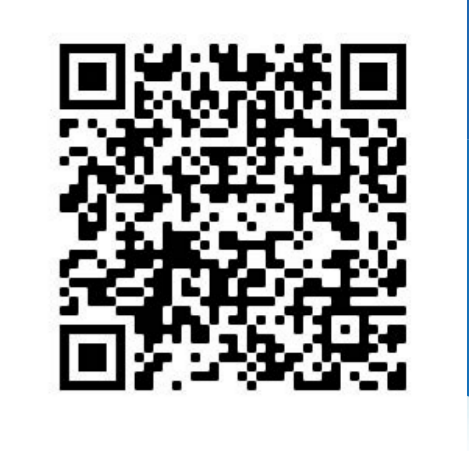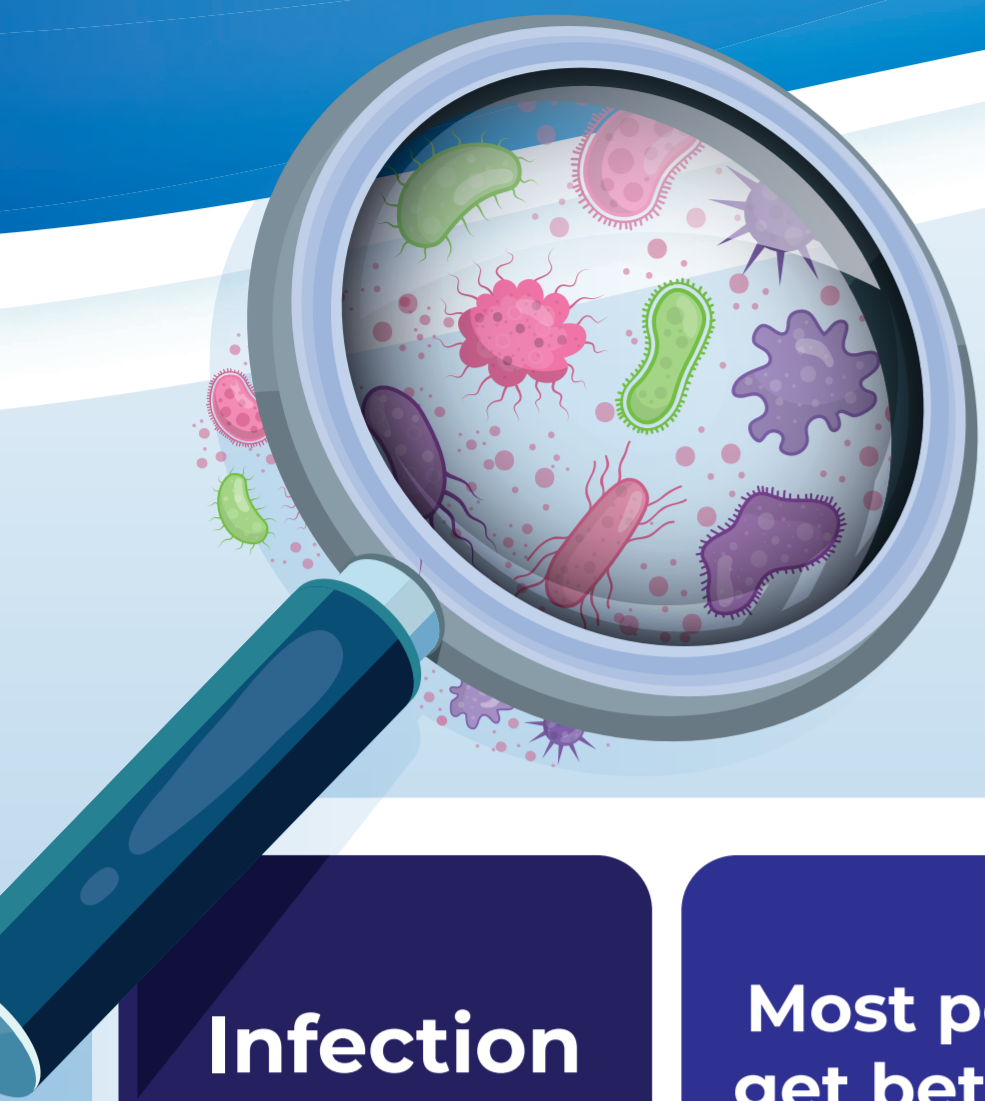

# Viruses or bacteria

## What caused your infection?

| Infection                        | Most people get better by | Common cause |                   |          | Are antibiotics recommended? |
|----------------------------------|---------------------------|--------------|-------------------|----------|------------------------------|
|                                  |                           | Virus        | Virus or bacteria | Bacteria |                              |
| COVID -19                        | 1-3 weeks                 | ✓            |                   |          | NO                           |
| Common cold                      | 1-2 weeks                 | ✓            |                   |          | NO                           |
| Flu                              | 1-2 weeks                 | ✓            |                   |          | NO                           |
| Laryngitis                       | 1-2 weeks                 | ✓            |                   |          | NO                           |
| Acute bronchitis / Bronchiolitis | 2-4 weeks                 | ✓            |                   |          | NO                           |
| Tonsillitis / Pharyngitis        | 1 week                    |              | ✓                 |          | SOMETIMES                    |
| Sinusitis                        | 1-2 weeks                 |              | ✓                 |          | SOMETIMES                    |
| Acute middle ear infection       | <1 week                   |              | ✓                 |          | SOMETIMES                    |
| Exacerbation of COPD             | 1-2 weeks                 |              | ✓                 |          | SOMETIMES                    |
| Pneumonia                        | 1-2 weeks                 |              |                   | ✓        | YES                          |
| Urinary tract infection          | 2-3 days                  |              |                   | ✓        | YES                          |

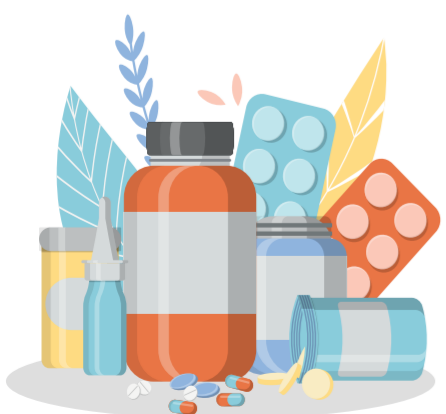

Antibiotics are only needed to treat certain infections caused by bacteria. Viral infections should not be treated with antibiotics. Use of antibiotics can lead to antimicrobial resistance. This means that antibiotics become ineffective and infections become increasingly difficult to treat.

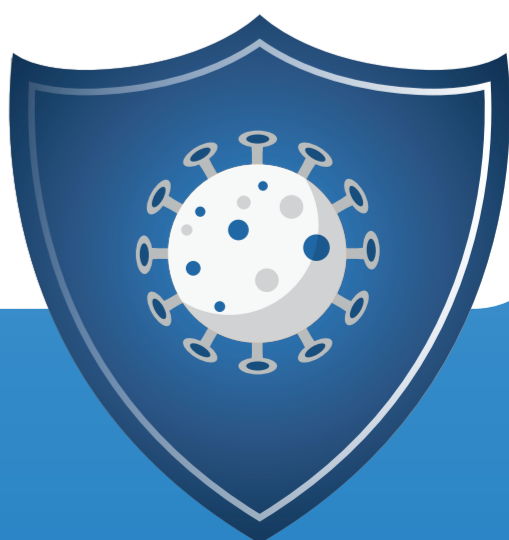

## URINARY TRACT INFECTIONS

A leaflet for older adults and their families

### WHAT IS A URINARY TRACT INFECTION?

A urinary tract infection occurs when bacteria enter the urinary tract and cause symptoms. The bacteria involved in a urinary tract infection come from your own gastrointestinal tract, where they normally exist.

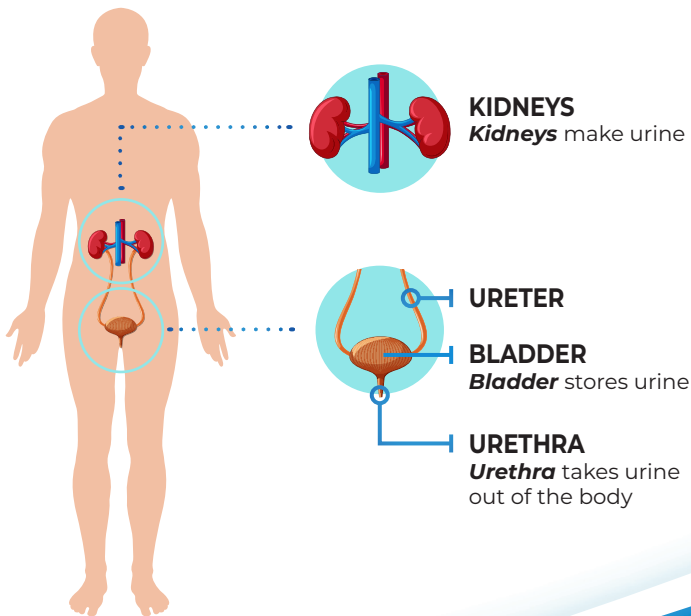

## WHAT ARE THE TYPICAL **SYMPTOMS** OF A URINARY TRACT INFECTION?

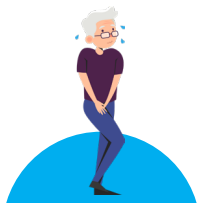

Frequent urination  
or urge

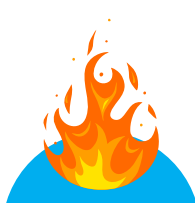

Burning sensation or  
pain when urinating

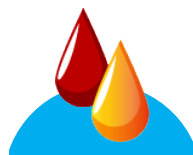

Blood in urine

- If you have some of these symptoms, you may have a urinary tract infection and you should contact a nurse or a medical doctor.
- If your symptoms do not improve within a couple of days after starting antibiotics, contact your doctor/nurse.

## WHAT ARE THE **SYMPTOMS** OF A SERIOUS INFECTION?

If the symptoms above are followed by symptoms below, it may be due to a possibly serious infection or complication and you should contact a healthcare professional urgently:

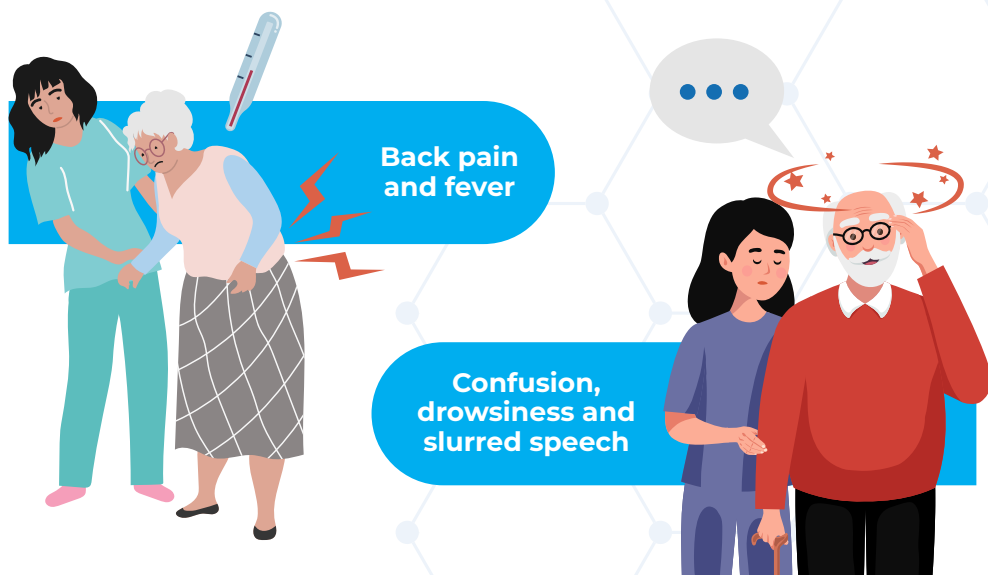

## ANTIBIOTICS FOR URINARY TRACT INFECTIONS: PROS AND CONS

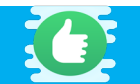

Antibiotics shorten the duration of urinary symptoms and are life saving by preventing serious complications such as pyelonephritis and septicemia.

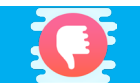

Antibiotics can come with side effects. Among the most common ones are rashes, vomiting, diarrhea, and increased risk of yeast infections.

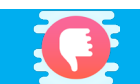

Taking antibiotics increases the risk of resistant bacteria. Bacteria resistant to antibiotics do not respond well to treatment.

## WHAT CAN YOU DO TO PREVENT A URINARY TRACT INFECTION?

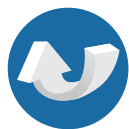

**Wipe genitals from front to back** after using the toilet to avoid that bacteria enter the urinary tract.

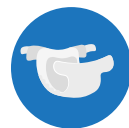

**Change pads** and clean genitals if soiled.

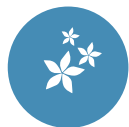

Keep the genital area **clean** and **dry**.

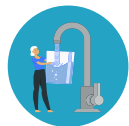

Drink **plenty** of water.

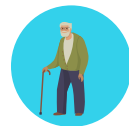

Try to **move around** as much as possible

# HAPPY PATIENT

Grant Agreement number 900024

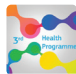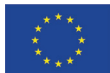

Co-funded by  
the Health Programme  
of the European Union

This project is funded by the  
European Union's Health Programme (2014-2020)

The content of this leaflet represents the views of the author only and is his/her sole responsibility; it cannot be considered to reflect the views of the European Commission and/or the Health and Digital Executive Agency (HaDEA), replacing the former CHAFEA since 01 April 2021, or any other body of the European Union. The European Commission and the Agency do not accept any responsibility for use that may be made of the information it contains.

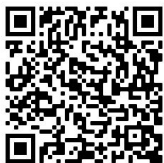

[www.happypatient.eu](http://www.happypatient.eu)

# 5 myths about urinary tract infections (UTI) in nursing home residents

## MYTH #1

**A positive test (dipstick/culture) in the elderly always means presence of a UTI...**

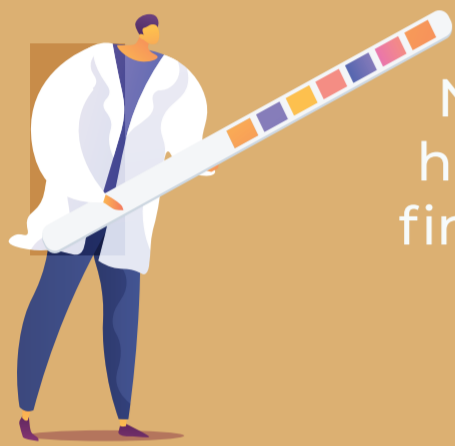

No, a substantial number of nursing home residents have bacteriuria and finding bacteria in the urine does not necessarily mean that the patient has a UTI.

## MYTH #2

**Antimicrobial resistance is not a problem in nursing homes...**

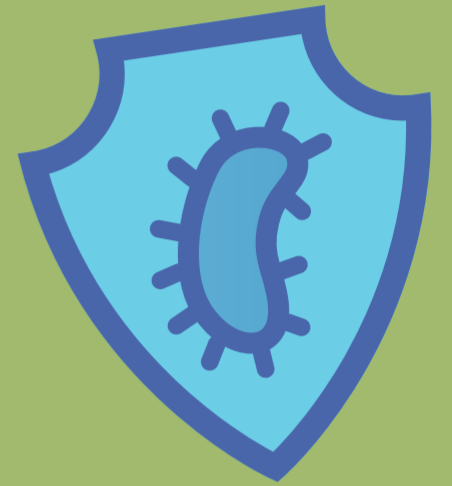

There is a high prevalence of resistant bacteria in nursing homes and it may reduce the efficacy of antibiotic treatments.

## MYTH #3

**A single urinary symptom indicates high probability of UTI...**

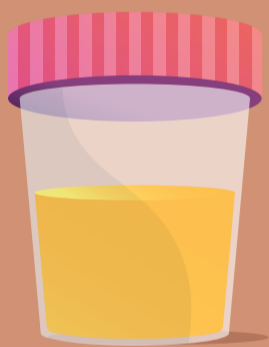

No. Only about half of patients with a single urinary symptom do have a UTI and to diagnose a UTI the urine should always be examined.

## MYTH #4

**Cognitive changes, agitation and confusion indicate high probability of UTI...**

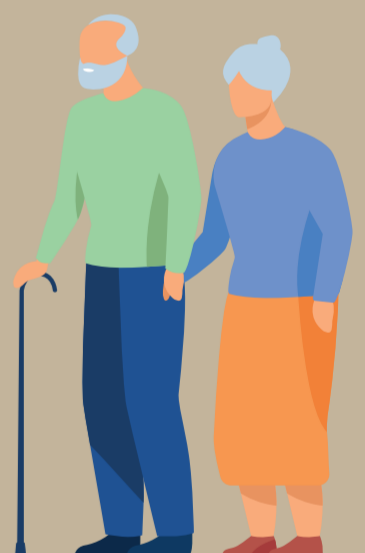

There are several possible causes of cognitive changes in the elderly, but UTI is not the most frequent one. Explore all possible causes, such as dehydration, pain, constipation, UTI, etc.

## MYTH #5

**When unsure of whether to prescribe an antibiotic or not ("better be safe than sorry"), the benefits of prescribing outweigh the harms of exposure to antibiotics...**

All antibiotics have side effects and may cause more harm than benefit particularly in the elderly people.

Additionally, all use of antibiotics can lead to antimicrobial resistance. This means that antibiotics become ineffective and infections become increasingly difficult to treat.

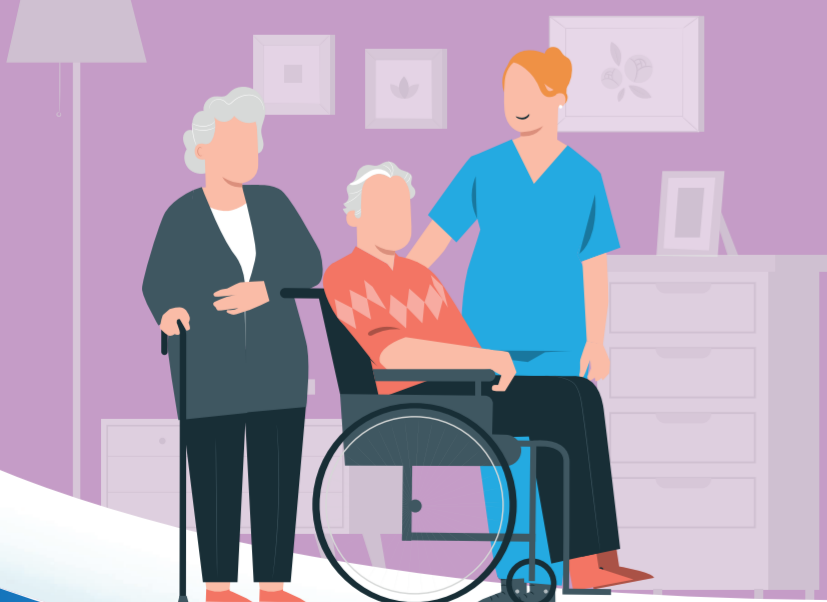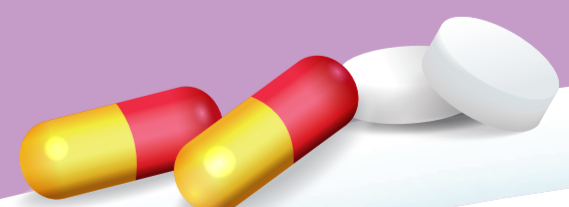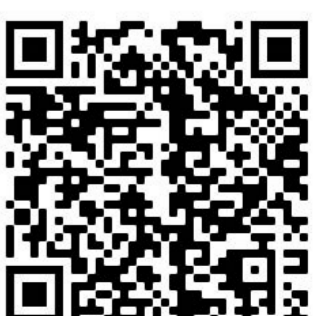

## What you need to know if you have been prescribed an antibiotic

### When to take your antibiotic:

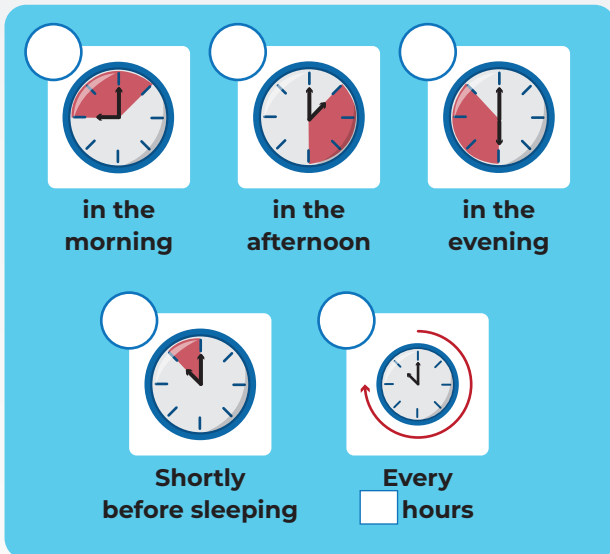

### How to take your antibiotic:

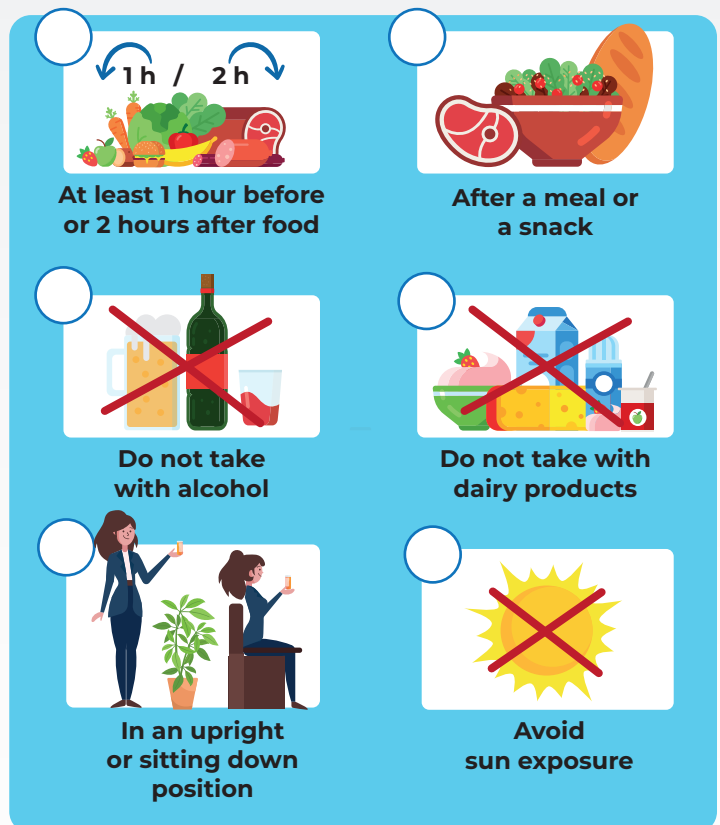

- **Duration of antibiotic treatment:**

You should stop your antibiotic treatment after  days.

- **Possible side effects include:**

Diarrhoea, nausea and vomiting, abdominal pain, loss of appetite, skin rashes, headache, dizziness, fungal infections (candida).

- **Possible food and drug interactions:**

- ▶ Combining the use of antibiotics with other medications or alcohol can modify the efficacy and increase the risk of adverse reactions.
- ▶ Ask your pharmacist or healthcare provider for any potential food and drug interactions.

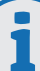

**Most side effects are mild and temporary.  
If side effects become severe, you should contact a  
healthcare professional**

## ● Please remember:

- ▶ Antibiotics are only needed to treat certain infections caused by bacteria. Use of antibiotics can lead to antimicrobial resistance. This is why we need to use antibiotics only when necessary.
- ▶ Take the prescribed antibiotic treatment according to the prescription from the doctor.
- ▶ Don't share antibiotics with your family members, friends, or animals.
- ▶ Return any unused antibiotics to the pharmacy.
- ▶ Contact your healthcare provider if your symptoms get worse.
- ▶ Inform your healthcare provider and/or your pharmacist about any allergies you may have.
- ▶ If you are pregnant, breastfeeding, or planning to get pregnant, make sure that your healthcare provider and/or pharmacist is aware of it, to ensure safe use of the medication.

## ● When to contact a pharmacist:

- ▶ For any questions about the medication you use.
- ▶ For information about relief of symptoms or side effects.
- ▶ If you are unsure about any of the information you have received.
- ▶ If you are unsure about how or when to take your medication.

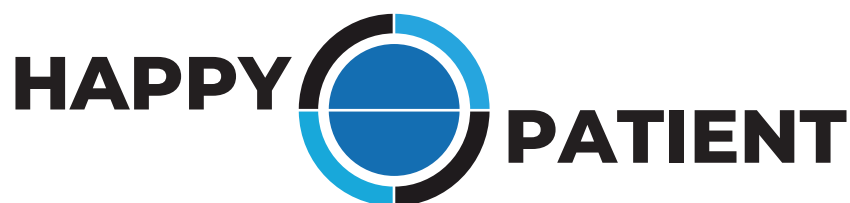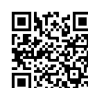

# HOW DOES ANTIMICROBIAL RESISTANCE OCCUR?

There is usually a small number of bacteria that mutate and become resistant to antibiotics.

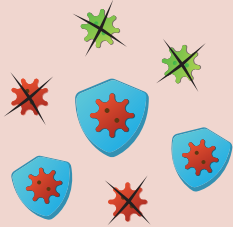

When we take antibiotics, they kill all susceptible bacteria, including the “good” bacteria that protect the body from infection. The drug-resistant bacteria survive and multiply.

Eventually, the drug-resistant bacteria become dominant and antibiotics stop working.

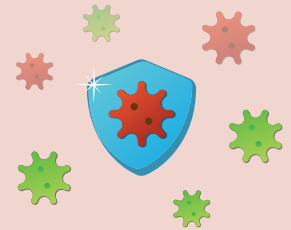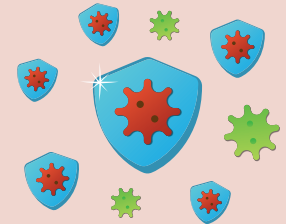

# INAPPROPRIATE USE OF ANTIBIOTICS LEADS TO ANTIMICROBIAL RESISTANCE

This is a serious global challenge. That means that the antibiotics we have today will be less effective in the future in treating life-threatening infections.

Currently antimicrobial resistance is affecting millions of people worldwide and kills more than 1 million people per year.

## EFFECTIVENESS

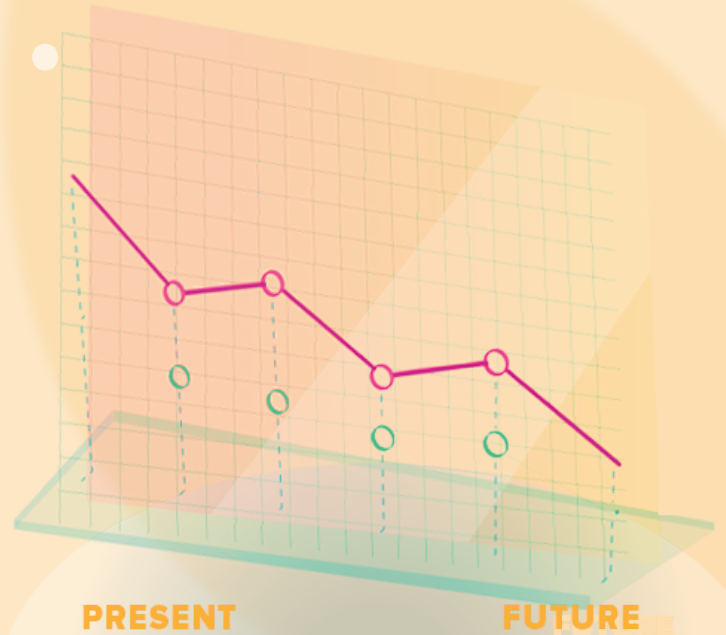

# ANTIMICROBIAL RESISTANCE IS A GLOBAL PROBLEM

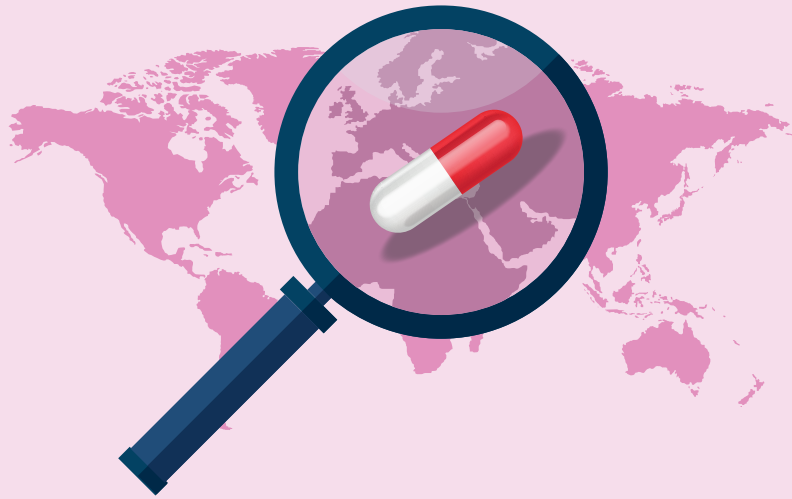

Everybody  
can contribute  
to the problem of  
antimicrobial resistance.  
Resistant bacteria  
do not respect  
borders.

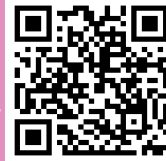

SCAN ME

Do you want  
to know your own  
contribution  
to antimicrobial  
resistance?

# WE NEED TO PROTECT AND PRESERVE OUR CURRENT ANTIBIOTICS

The problem of antimicrobial resistance will not be solved with new antibiotics.

Bacteria are smarter than humans and they become resistant to antibiotics shortly after using them.

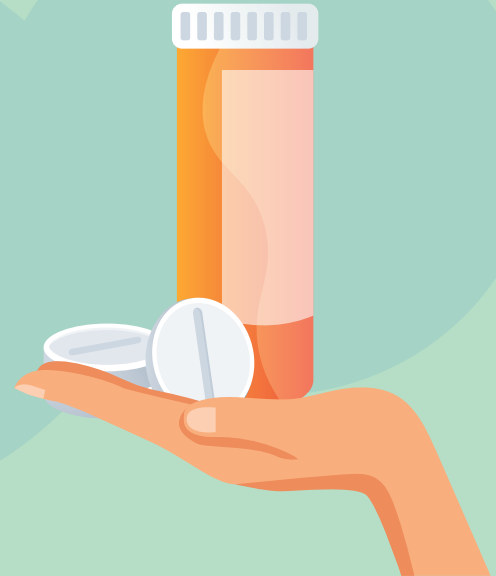

# ANTIBIOTICS WON'T TREAT YOUR COLD OR FLU

Cold and flu are caused by viruses.  
Antibiotics are only effective against  
infections caused by bacteria,  
therefore they do not help  
against cold and flu.

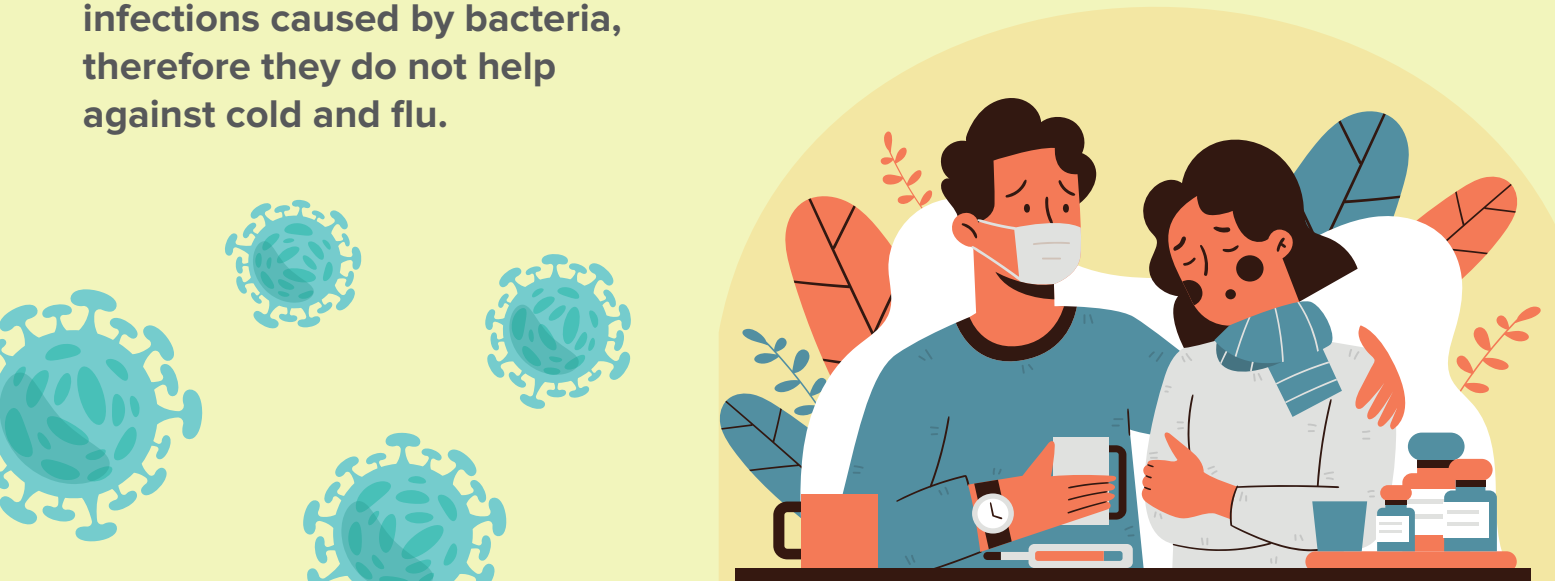

# ANTIBIOTICS HAVE SIDE EFFECTS

Common  
side  
effects  
of antibiotics

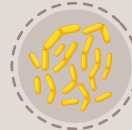

**YEAST INFECTION**

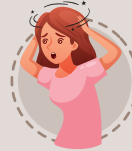

**DIZZINESS**

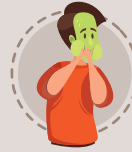

**NAUSEA**

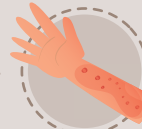

**RASH**

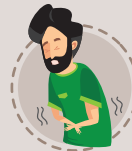

**DIARRHEA**

# NEVER TAKE LEFTOVER ANTIBIOTICS OR SHARE ANTIBIOTICS WITH FAMILY & FRIENDS

The pharmacist can assess your symptoms, give you advice, recommend over-the-counter medication or tell you to contact a doctor.

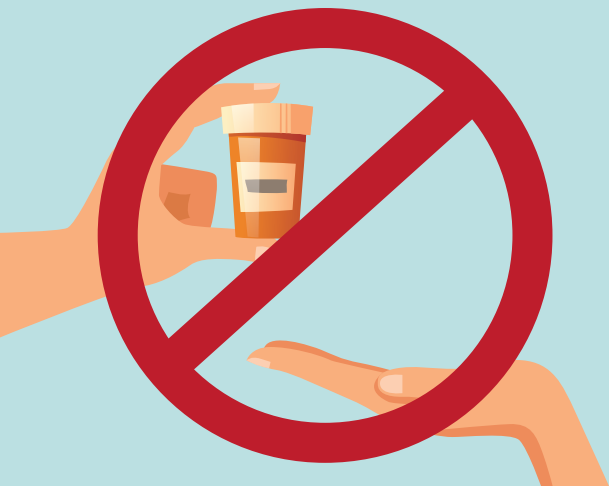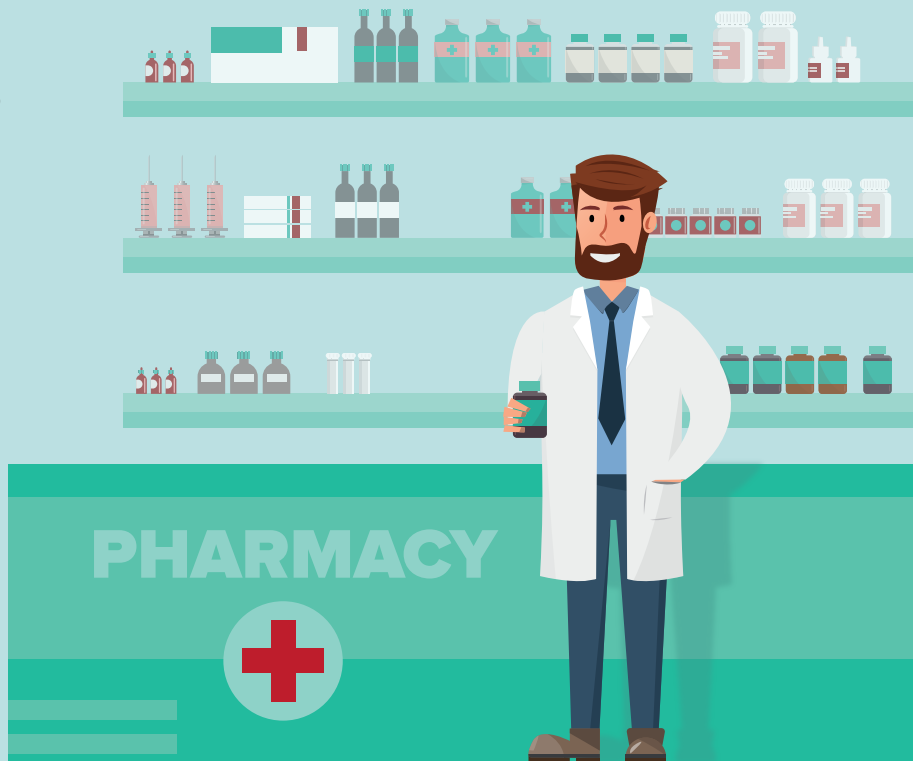

# MORE INFORMATION ABOUT HAPPY PATIENT

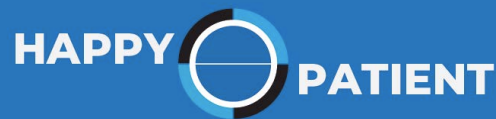

## TRAINING HEALTHCARE PROFESSIONALS AND EMPOWERING THE PATIENT

**SCAN ME**

and access our website and material

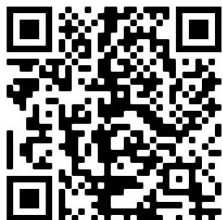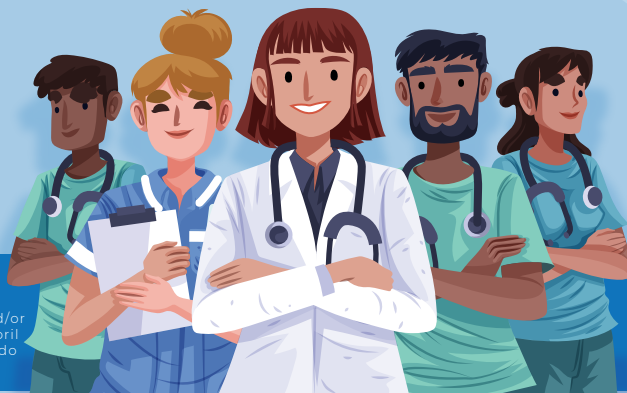

This project is funded by the European Union's Third Health Programme (2014-2020). The content of this poscard represents the views of the author only and is his/her sole responsibility; it cannot be considered to reflect the views of the European Commission and/or the Health and Digital Executive Agency (HaDEA), replacing the former CHAFAEA since 01 April 2021, or any other body of the European Union. The European Commission and the Agency do not accept any responsibility for use that may be made of the information it contains.

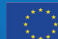

Co-funded by  
the Health Programme  
of the European Union

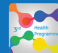

Supplement: Supplementary file 2 [file supplementary › Supplementary file S4.pdf]
