# Supplementary material for: Misconceptions and Knowledge Gaps on Antibiotic Use in Primary Care – a Delphi Study in Four Sectors and Five European Countries
Source: Preprints.org preprint supplement (doi:10.20944/preprints202307.1235.v1), 2023-07-18
Supplement: Supplementary file 2 [file supplementary]

Archive with 4 entries (4 files):
- Supplementary file S1.pdf
- Supplementary file S2.pdf
- Supplementary file S3.pdf
- Supplementary file S4.pdf
