# Supplementary material for: Misconceptions and Knowledge Gaps on Antibiotic Use in Primary Care – a Delphi Study in Four Sectors and Five European Countries
Source: Preprints.org preprint supplement (doi:10.20944/preprints202307.1235.v1), 2023-07-18
Supplement: Supplementary file 2 [file supplementary › Supplementary file S1.pdf]

Additional file 1

List of project partners

| No | Type                                 | Role                                        | Name                                                                                            | Short name              | Country |
|----|--------------------------------------|---------------------------------------------|-------------------------------------------------------------------------------------------------|-------------------------|---------|
| 1  | Research org.                        | Clinical partners                           | Research Unit for General Practice Odense                                                       | <a href="#">RUPO</a>    | DK      |
| 2  | Research org.                        |                                             | NORCE Norwegian Research Centre AS                                                              | <a href="#">NORCE</a>   | NO      |
| 3  | Governmental                         |                                             | The Capital Region of Denmark                                                                   | <a href="#">CAPREG</a>  | DK      |
| 4  | Research org.                        |                                             | Rijksuniversiteit Groningen                                                                     | <a href="#">RUG</a>     | NL      |
| 5  | Affiliated to<br><a href="#">ICS</a> | Host partners<br>in the Target<br>Countries | Fundacio Institut Universitari Pera la Recerca a l'atencio Primaria De Salut Jorgi Gol i Gurina | <a href="#">IDIAP</a>   | ES      |
| 6  | University                           |                                             | Nice University Hospital                                                                        | <a href="#">CHUNICE</a> | FR      |
| 7  | SME                                  |                                             | My Family Doctor (Mano Seimos Gydytojas)                                                        | <a href="#">FDC</a>     | LT      |
| 8  | University                           |                                             | Medical University of Lodz                                                                      | <a href="#">MUL</a>     | PL      |
| 9  | University                           |                                             | University of Crete                                                                             | <a href="#">UOC</a>     | EL      |
