# Supplementary material for: Misconceptions and Knowledge Gaps on Antibiotic Use in Primary Care – a Delphi Study in Four Sectors and Five European Countries
Source: Preprints.org preprint supplement (doi:10.20944/preprints202307.1235.v1), 2023-07-18
Supplement: Supplementary file 2 [file supplementary › Supplementary file S3.pdf]

Additional file 3 – List of publications used for the extraction of the statements used in the Delphi study

1. Dempsey PP, Businger AC, Whaley LE, Gagne JJ, Linder JA. Primary care clinicians perceptions about antibiotic prescribing for acute bronchitis: A qualitative study. *BMC Fam Pract* [Internet]. 2014 Dec 12 [cited 2022 Nov 28];15(1):1–10. Available from: <https://bmcprimcare.biomedcentral.com/articles/10.1186/s12875-014-0194-5>
2. Rusic D, Bukić J, Seselja Perisin A, Leskur D, Modun D, Petric A, et al. Are We Making the Most of Community Pharmacies? Implementation of Antimicrobial Stewardship Measures in Community Pharmacies: A Narrative Review. *Antibiotics* [Internet]. 2021 Jan 1 [cited 2022 Nov 28];10(1):1–14. Available from: [/pmc/articles/PMC7827930/](https://pubmed.ncbi.nlm.nih.gov/33827930/)
3. van der Velden A, Duerden MG, Bell J, Oxford JS, Altiner A, Kozlov R, et al. Prescriber and Patient Responsibilities in Treatment of Acute Respiratory Tract Infections — Essential for Conservation of Antibiotics. *Antibiotics* [Internet]. 2013 Jun 4 [cited 2022 Nov 28];2(2):316. Available from: [/pmc/articles/PMC4790342/](https://pubmed.ncbi.nlm.nih.gov/24790342/)
4. Panagakou SG, Spyridis ikos, Papaevangelou V, Theodoridou KM, Goutziana GP, Theodoridou MN, et al. Antibiotic use for upper respiratory tract infections in children: A cross-sectional survey of knowledge, attitudes, and practices (KAP) of parents in Greece. *BMC Pediatr* [Internet]. 2011 Jul 5 [cited 2022 Nov 28];11:60. Available from: [/pmc/articles/PMC3141508/](https://pubmed.ncbi.nlm.nih.gov/2141508/)
5. Woods CJ, Morrice Z, Francis NA, Little P, Verheij T, Leydon GM. Parent and clinician views of managing children with symptoms of a lower respiratory tract infection and their influence upon decisions to take part in a placebo-controlled randomised control trial. *Antibiotics* [Internet]. 2021 Apr 1 [cited 2022 Nov 28];10(4). Available from: [/pmc/articles/PMC8065881/](https://pubmed.ncbi.nlm.nih.gov/34065881/)
6. Cordoba G, Siersma V, Lopez-Valcarcel B, Bjerrum L, Llor C, Aabenhus R, et al. Prescribing style and variation in antibiotic prescriptions for sore throat: cross-sectional study across six countries. *BMC Fam Pract* [Internet]. 2015 [cited 2022 Nov 28];16(1). Available from: <https://pubmed.ncbi.nlm.nih.gov/25630870/>
7. Chaaban T, Ahouah M, Lombrail P, le Febvre H, Mourad A, Morvillers JM, et al. Decisional issues in antibiotic prescribing in French nursing homes: An ethnographic study. *J Public Health Res* [Internet]. 2019 Sep 9 [cited 2022 Nov 28];8(2):90–5. Available from: [/pmc/articles/PMC6886007/](https://pubmed.ncbi.nlm.nih.gov/316886007/)
8. Willems CSJ, van den broek d'obrenan J, Numans ME, Verheij TJM, van der velden AW. Cystitis: antibiotic prescribing, consultation, attitudes and opinions. *Fam Pract* [Internet]. 2014 Apr 1 [cited 2022 Nov 28];31(2):149–55. Available from: <https://academic.oup.com/fampra/article/31/2/149/452688>
9. Björkman I, Berg J, Viberg N, Stålsby Lundborg C. Awareness of antibiotic resistance and antibiotic prescribing in UTI treatment: A qualitative study among primary care physicians in Sweden. *Scand J Prim Health Care* [Internet]. 2013 Mar [cited 2022 Nov 28];31(1):50. Available from: [/pmc/articles/PMC3587295/](https://pubmed.ncbi.nlm.nih.gov/23587295/)
10. Plate A, Kronenberg A, Risch M, Mueller Y, di Gangi S, Rosemann T, et al. Treatment of urinary tract infections in Swiss primary care: Quality and determinants of antibiotic prescribing. *BMC Fam Pract* [Internet]. 2020 Jul 1 [cited 2022 Nov 28];21(1):1–9. Available from: <https://bmcprimcare.biomedcentral.com/articles/10.1186/s12875-020-01201-1>
11. Lakhani JD, Lakhani SJ, Meera S, Sanket P, Sandeep J. Appropriate use of antimicrobial agents in urinary tract infections: Perception of physicians and resident doctors. *Journal of Integrated Health*

Sciences [Internet]. 2019 [cited 2022 Nov 28];7(1):19. Available from: <https://www.jihs.in/article.asp?issn=2347-6486;year=2019;volume=7;issue=1;spage=19;epage=24;aulast=Lakhani>

12. Duane S, Domegan C, Callan A, Galvin S, Cormican M, Bennett K, et al. Using qualitative insights to change practice: exploring the culture of antibiotic prescribing and consumption for urinary tract infections. *BMJ Open* [Internet]. 2016 Jan 1 [cited 2022 Nov 28];6(1):e008894. Available from: <https://bmjopen.bmj.com/content/6/1/e008894>
13. Leydon GM, Turner S, Smith H, Little P. Women's views about management and cause of urinary tract infection: qualitative interview study. *BMJ* [Internet]. 2010 Feb 5 [cited 2022 Nov 28];340(7743):407. Available from: <https://www.bmj.com/content/340/bmj.c279>
14. Leydon GM, Turner S, Smith H, Little P. The journey from self-care to GP care: a qualitative interview study of women presenting with symptoms of urinary tract infection. *The British Journal of General Practice* [Internet]. 2009 Jul 7 [cited 2022 Nov 28];59(564):e219. Available from: </pmc/articles/PMC2702035/>
15. Minejima E, Lee E, Quach S, Santos N, Lou M, Wong-Beringer A. Understanding patient perceptions and attitudes toward urinary tract infections and treatment in a medically underserved population. *JACCP Journal of the American College of Clinical Pharmacy*. 2019 Dec 1;2(6):616–22.
16. Roope LSJ, Tonkin-Crine S, Butler CC, Crook D, Peto T, Peters M, et al. Reducing demand for antibiotic prescriptions: evidence from an online survey of the general public on the interaction between preferences, beliefs and information, United Kingdom, 2015. *Eurosurveillance* [Internet]. 2018 Jun 6 [cited 2022 Nov 28];23(25):1. Available from: </pmc/articles/PMC6152238/>
17. Robert A, Nguyen Y, Bajolet O, Vuillemin B, Defoin B, Vernet-Garnier V, et al. Knowledge of antibiotics and antibiotic resistance in patients followed by family physicians. *Med Mal Infect*. 2017 Mar 1;47(2):142–51.
18. McNulty CAM, Nichols T, Boyle PJ, Woodhead M, Davey P. The English antibiotic awareness campaigns: did they change the public's knowledge of and attitudes to antibiotic use? *Journal of Antimicrobial Chemotherapy* [Internet]. 2010 Jul 1 [cited 2022 Nov 28];65(7):1526–33. Available from: <https://academic.oup.com/jac/article/65/7/1526/787840>
19. McNulty CAM, Collin SM, Cooper E, Lecky DM, Butler CC. Public understanding and use of antibiotics in England: findings from a household survey in 2017. *BMJ Open* [Internet]. 2019 Oct 1 [cited 2022 Nov 28];9(10):e030845. Available from: <https://bmjopen.bmj.com/content/9/10/e030845>
20. van Hecke O, Butler CC, Wang K, Tonkin-Crine S. Parents' perceptions of antibiotic use and antibiotic resistance (PAUSE): a qualitative interview study. *Journal of Antimicrobial Chemotherapy* [Internet]. 2019 Jun 1 [cited 2022 Nov 28];74(6):1741–7. Available from: <https://academic.oup.com/jac/article/74/6/1741/5382160>
21. Hawke KL, McGuire TM, Ranmuthugala G, van Driel ML. What do consumers want to know about antibiotics? Analysis of a medicines call centre database. *Fam Pract* [Internet]. 2016 Feb 1 [cited 2022 Nov 28];33(1):75–81. Available from: <https://academic.oup.com/fampra/article/33/1/75/2450447>
22. Pavydė E, Veikutis V, Mačiulienė A, Mačiulis V, Petrikonis K, Stankevičius E. Public Knowledge, Beliefs and Behavior on Antibiotic Use and Self-Medication in Lithuania. *Int J Environ Res Public Health* [Internet]. 2015 [cited 2022 Nov 28];12:7002–16. Available from: [www.mdpi.com/journal/ijerphArticle](http://www.mdpi.com/journal/ijerphArticle)
23. McCullough AR, Parekh S, Rathbone J, del Mar CB, Hoffmann TC. A systematic review of the public's knowledge and beliefs about antibiotic resistance. *Journal of Antimicrobial Chemotherapy*

[Internet]. 2016 Jan 1 [cited 2022 Nov 28];71(1):27–33. Available from: <https://academic.oup.com/jac/article/71/1/27/2363966>

24. Godycki-Cwirko M, Cals JWL, Francis N, Verheij T, Butler CC, Goossens H, et al. Public Beliefs on Antibiotics and Symptoms of Respiratory Tract Infections among Rural and Urban Population in Poland: A Questionnaire Study. PLoS One [Internet]. 2014 Oct 2 [cited 2022 Nov 28];9(10):e109248. Available from: <https://journals.plos.org/plosone/article?id=10.1371/journal.pone.0109248>
25. Cals JWL, Boumans D, Lardinois RJM, Gonzales R, Hopstaken RM, Butler CC, et al. Public beliefs on antibiotics and respiratory tract infections: an internet-based questionnaire study. The British Journal of General Practice [Internet]. 2007 Dec 12 [cited 2022 Nov 28];57(545):942. Available from: [/pmc/articles/PMC2084132/](https://pubmed.ncbi.nlm.nih.gov/172084132/)
26. Roope LSJ, Tonkin-Crine S, Herd N, Michie S, Pouwels KB, Castro-Sanchez E, et al. Reducing expectations for antibiotics in primary care: A randomised experiment to test the response to fear-based messages about antimicrobial resistance. BMC Med [Internet]. 2020 Apr 23 [cited 2022 Nov 28];18(1):1–11. Available from: <https://bmcmedicine.biomedcentral.com/articles/10.1186/s12916-020-01553-6>
27. Richmond J, Mangrum R, Wang G, Maurer M, Sofaer S, Yang M, et al. An informed public's views on reducing antibiotic overuse. Health Serv Res [Internet]. 2019 Dec 1 [cited 2022 Nov 28];54(6):1283. Available from: [/pmc/articles/PMC6863223/](https://pubmed.ncbi.nlm.nih.gov/3206863223/)
